# Supplementary figures and images for: A new gallium complex inhibits tumor cell invasion and matrix metalloproteinase MMP-14 expression and activity
Source: Royal Society of Chemistry journal article supplement (doi:10.1039/c7mt00049a), 2017-01-01

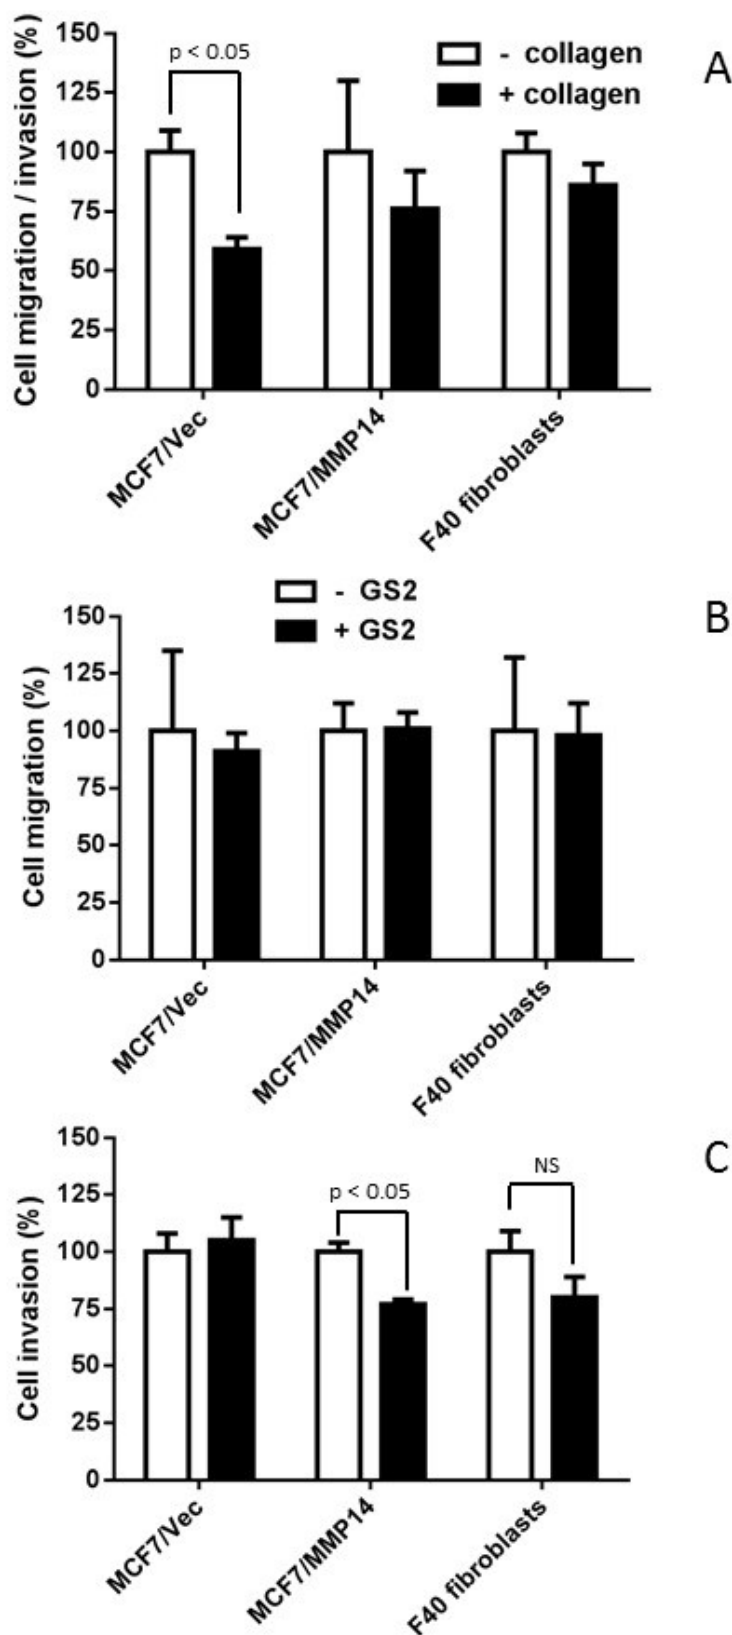

Supplement: c7mt00049a2.pdf [file c7mt00049a2.pdf]
